# Supplementary material for: Molecular signatures of retinal ganglion cells revealed through single cell profiling
Source: PubMed Central journal article supplement (PMC6823391; doi:10.1038/s41598-019-52215-4), 2019-10-31
Supplement: 41598_2019_52215_MOESM1_ESM.pdf [file 41598_2019_52215_MOESM1_ESM.pdf]

**Molecular signatures of retinal ganglion cells revealed through single cell profiling**

Lauren A. Laboissonniere<sup>1</sup>, Jillian J. Goetz<sup>2</sup>, Gregory M. Martin<sup>3</sup>, Ran Bi<sup>4</sup>, Terry J.S. Lund<sup>5</sup>,  
Laura Ellson<sup>5</sup>, Madison R. Lynch<sup>5</sup>, Bailey Mooney<sup>5</sup>, Hannah Wickham<sup>5</sup>, Peng Liu<sup>4</sup>,  
Gregory W. Schwartz<sup>2</sup>, and Jeffrey M. Trimarchi<sup>6\*</sup>

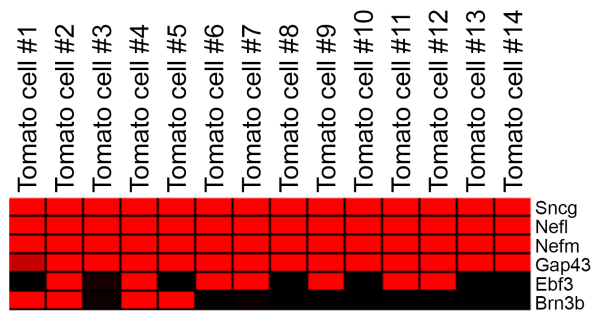

**Supplementary Figure 1. RGC marker genes expressed in tdTomato+ cells.**

The expression of RGC genes was examined in our tdTomato+ cells and visualized by heatmap. Genes examined included *Sncg*, *Nefl*, *Nefm*, *Gap43*, *Ebf3*, and *Brn3b*.

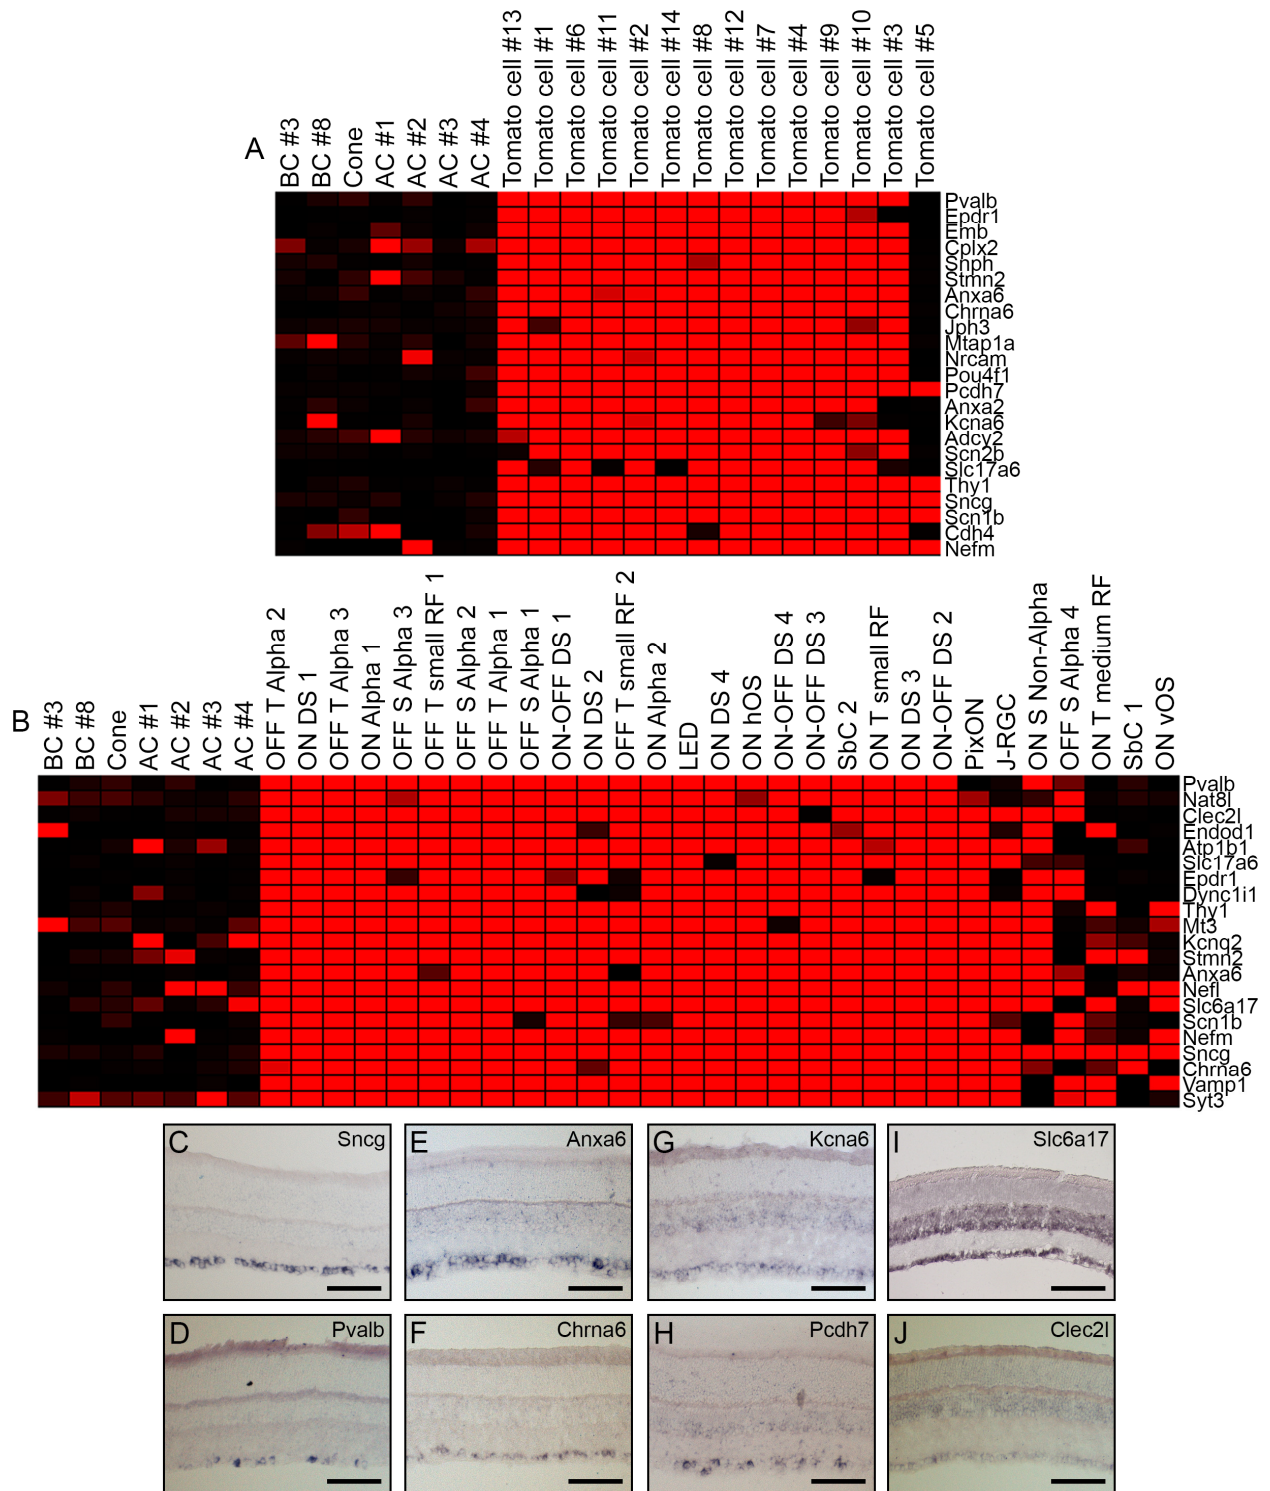

### Supplementary Figure 2. Parvalbumin gene correlates detected in RGCs.

Genes highly correlated with *Pvalb* in the tdTomato+ cell population were determined through Pearson correlation and visualized by heatmap (A). Among the physiologically classified RGCs, *Pvalb* correlated genes were also defined by Pearson correlation and demonstrated through heatmap (B). *Pvalb* correlated genes from both datasets were then examined by ISH: *Sncg* (C), *Pvalb* (D), *Anxa6* (E), *Chrna6* (F), *Kcna6* (G), *Pcdh7* (H), *Slc6a17* (I), and *Clec2l* (J). Scale bars represent 100  $\mu$ m.

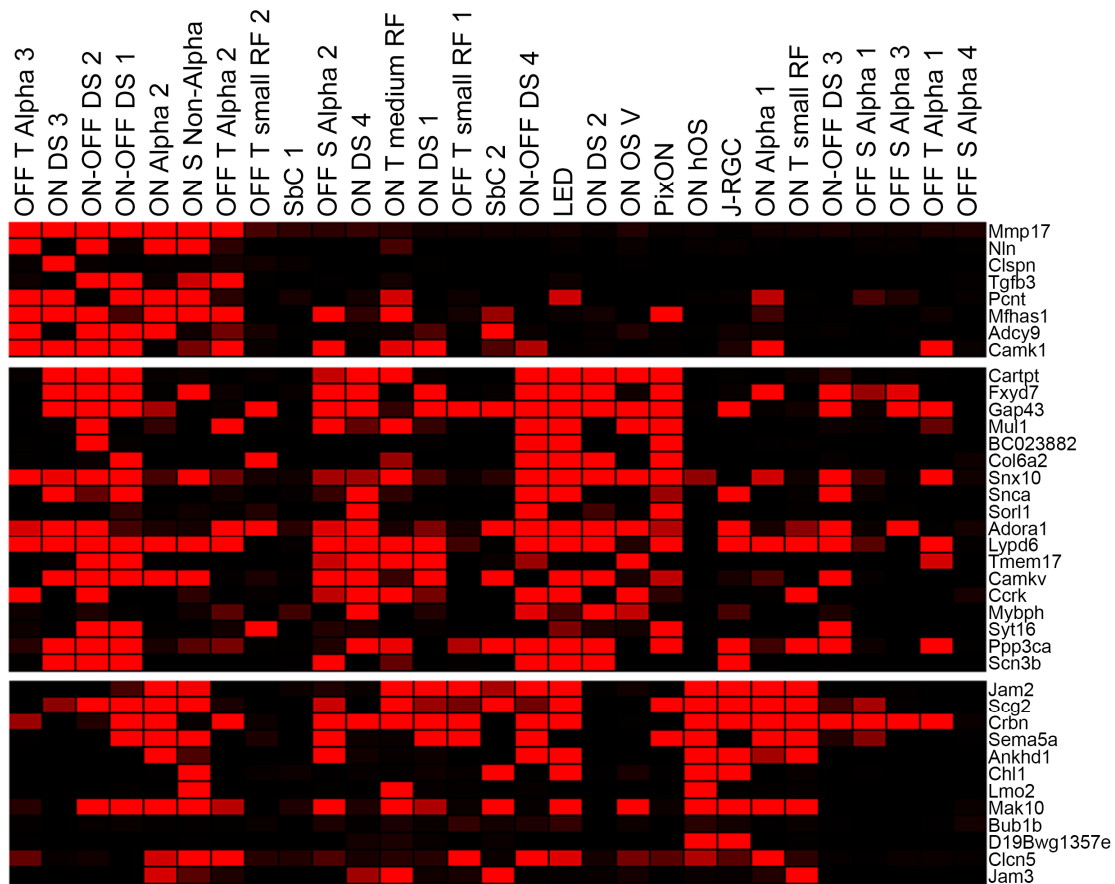

**Supplementary Figure 3. Genes correlated with RGC subtype markers.**

The genes which were most highly correlated (Pearson correlation) with previously identified RGC subtype markers, *Mmp17*, *Cartpt*, and *Jam2*, were identified within the characterized RGCs.

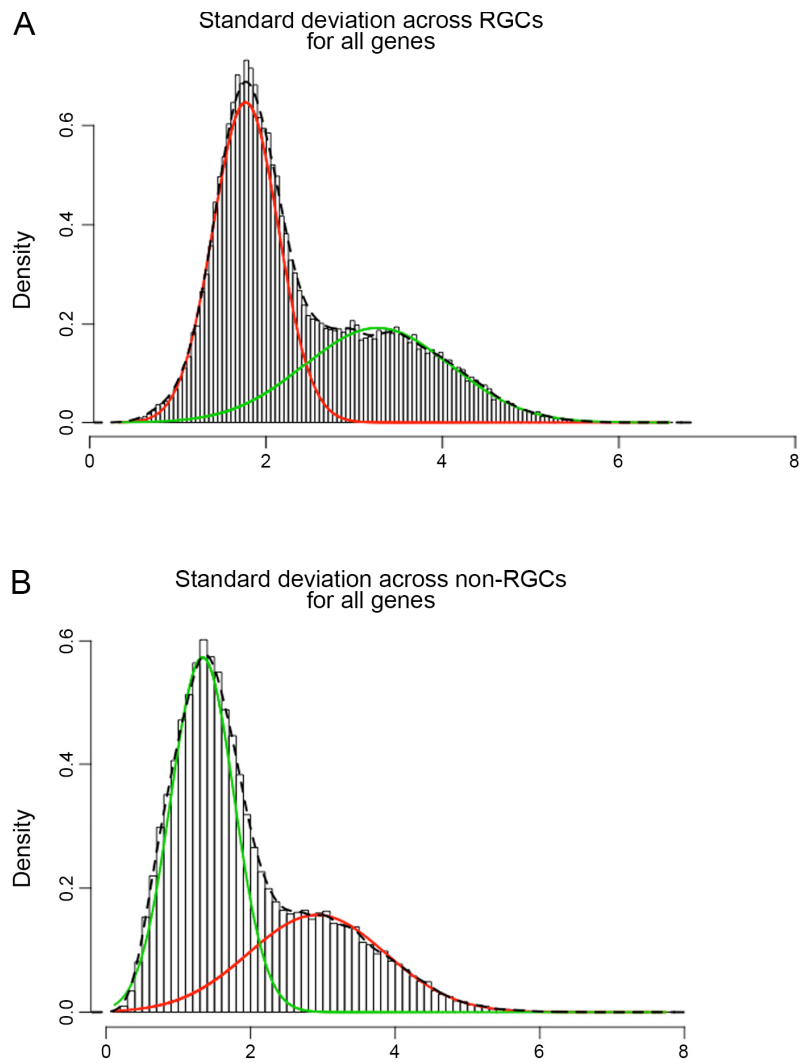

**Supplementary Figure 4. Standard deviation of microarray data across RGCs and non-RGCs.**

The standard deviation of gene expression among the physiologically characterized RGCs (A) and non-RGCs (B) was examined.
